# Supplementary material for: Whole-genome enrichment and sequencing of Chlamydia trachomatisdirectly from clinical samples
Source: PubMed Central journal article supplement (PMC4233057; doi:10.1186/s12879-014-0591-3), 2014-11-12
Supplement: 12879_2014_591_MOESM2_ESM.pdf [file 12879_2014_591_MOESM2_ESM.pdf]

## Additional file 2: Recovery of complete plasmid sequence directly from clinical specimens

| ID    | Plasmid copies/ $\mu$ l | Reads mapping to <i>C. trachomatis</i> plasmid | Mean read depth | Coverage of reference <i>C. trachomatis</i> plasmid |
|-------|-------------------------|------------------------------------------------|-----------------|-----------------------------------------------------|
| CT-33 | 4,350,790               | 37.91%                                         | 41945           | 100%                                                |
| CT-34 | 45,417                  | 2.31%                                          | 3727            | 100%                                                |
| CT-35 | 16,948                  | 0.20%                                          | 147             | 100%                                                |
| CT-36 | 80,826                  | 1.06%                                          | 797             | 100%                                                |
| CT-37 | 54,154                  | 0.80%                                          | 642             | 100%                                                |
| CT-38 | 4,698                   | 0.34%                                          | 301             | 100%                                                |
| CT-39 | 4,056                   | 0.12%                                          | 104             | 100%                                                |
| CT-40 | 22,388                  | 4.08%                                          | 5822            | 100%                                                |
| CT-41 | 2,367                   | 0.11%                                          | 91              | 100%                                                |
| CT-42 | 5,093                   | 0.30%                                          | 277             | 100%                                                |
