# Supplementary material for: Whole-genome enrichment and sequencing of Chlamydia trachomatisdirectly from clinical samples
Source: PubMed Central journal article supplement (PMC4233057; doi:10.1186/s12879-014-0591-3), 2014-11-12

**Additional file 6: Non-synonymous and Synonymous Variants (>0% - <50%)**

**Synonymous variants**

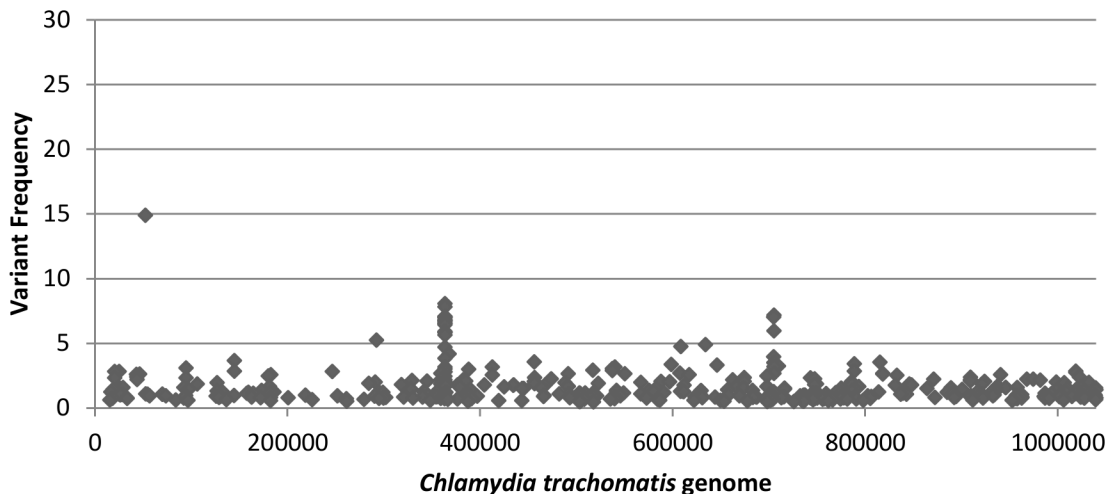

**Non-synonymous variants**

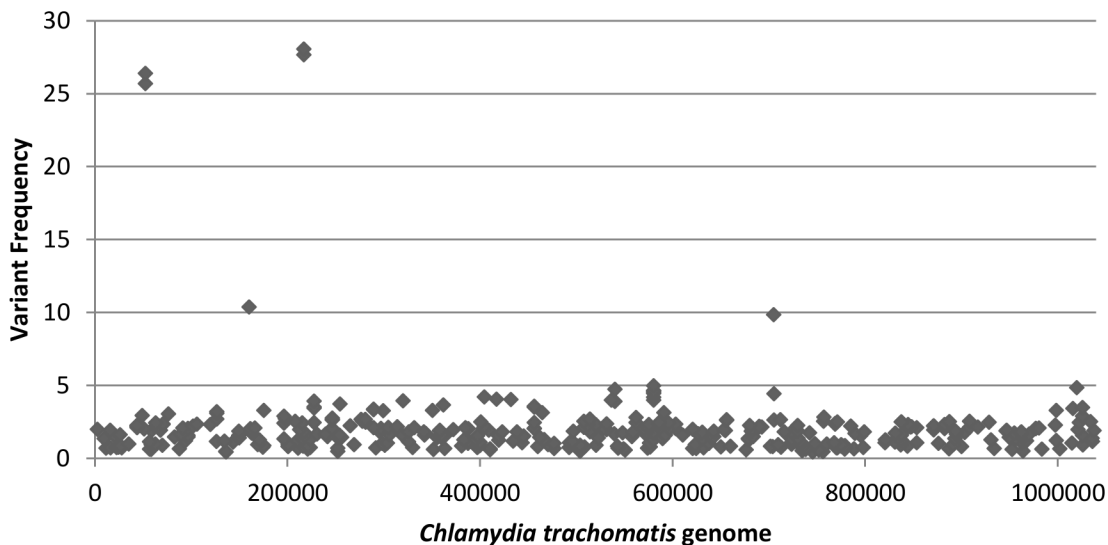

Supplement: 12879_2014_591_MOESM6_ESM.pdf [file 12879_2014_591_MOESM6_ESM.pdf]
