# Supplementary material for: Whole-genome enrichment and sequencing of Chlamydia trachomatisdirectly from clinical samples
Source: Springer Nature journal article supplement (doi:10.1186/s12879-014-0591-3), 2014-11-11
Supplement: MOESM5 [file 12879_2014_591_MOESM5_ESM.pdf]

### **Additional file 5: Mutations associated with antimicrobial resistance identified in one clinical sample (CT-36|E)**

| <b>Gene</b> | <b>Nucleotide Position</b> | <b>Ref</b> | <b>Allele</b> | <b>Count</b> | <b>Coverage</b> | <b>Frequency (%)</b> | <b>Strand balance</b> | <b>Average quality</b> | <b>Coding region change</b> | <b>Amino acid change</b> |
|-------------|----------------------------|------------|---------------|--------------|-----------------|----------------------|-----------------------|------------------------|-----------------------------|--------------------------|
| L22         | 154                        | G          | A             | 11           | 11              | 100                  | 0.4                   | 38                     | 154G>A                      | Gly52Ser                 |
| L22         | 193                        | C          | T             | 17           | 18              | 94.44                | 0.5                   | 38.35                  | 193C>T                      | Arg65Cys                 |
| L22         | 230                        | T          | C             | 13           | 14              | 92.86                | 0.5                   | 38.14                  | 230T>C                      | Val77Ala                 |
